# Supplementary material for: Enhanced flame retardant performance of poly(vinyl alcohol) composites based on phosphorus–metal ion synergistic effect
Source: Royal Society of Chemistry journal article supplement (doi:10.1039/d3nj02686h), 2023-01-01
Supplement: d3nj02686h1.pdf [file d3nj02686h1.pdf]

# **Supporting Information**

## **Enhanced flame retardant performance of poly(vinyl alcohol) composites by hydrogen bonding**

Yide Liu, Jiuyong Yao, Kai Li, Xiankai Li \*, Yanzhi Xia \*

State Key Laboratory of Bio-Fibers and Eco-Textiles, Collaborative Innovation Center for Marine Biomass Fibers, Materials and Textiles of Shandong Province, College of Materials Science and Engineering, Insitute of Marine Biobased Materials, Qingdao University, Ningxia Road 308, Qingdao, 266071, P.R.

### **Corresponding author**

\*Tel.: +86-532-85953609. E-mail: likai235@163.com (X. Li)

\*Tel.: +86-532-85953609. E-mail: xiayz@qdu.edu.cn (Y. Xia)

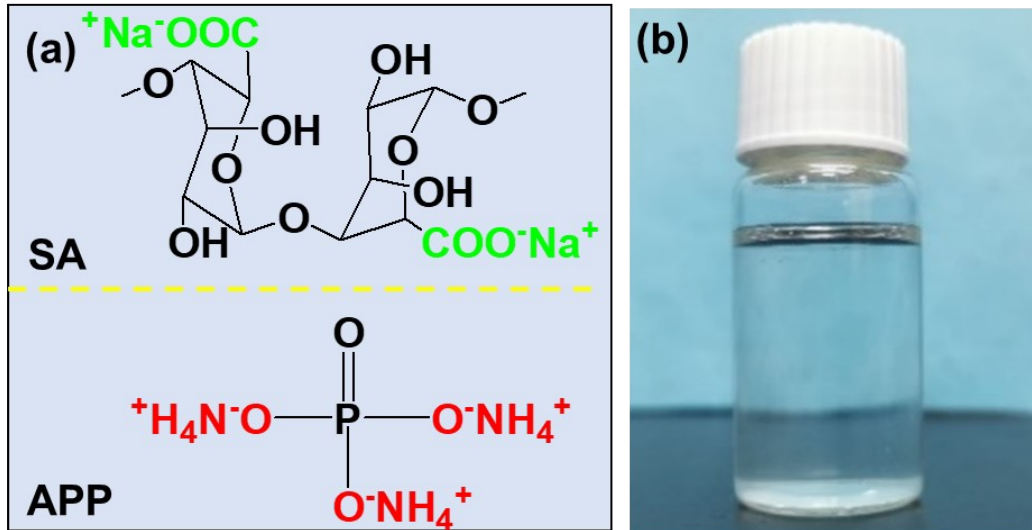

12

13 **Figure S1.** (a) The chemical structure of SA and APP. (b) Optical images of PVA/APP<sub>10</sub>/SA<sub>5</sub>

14

solution.

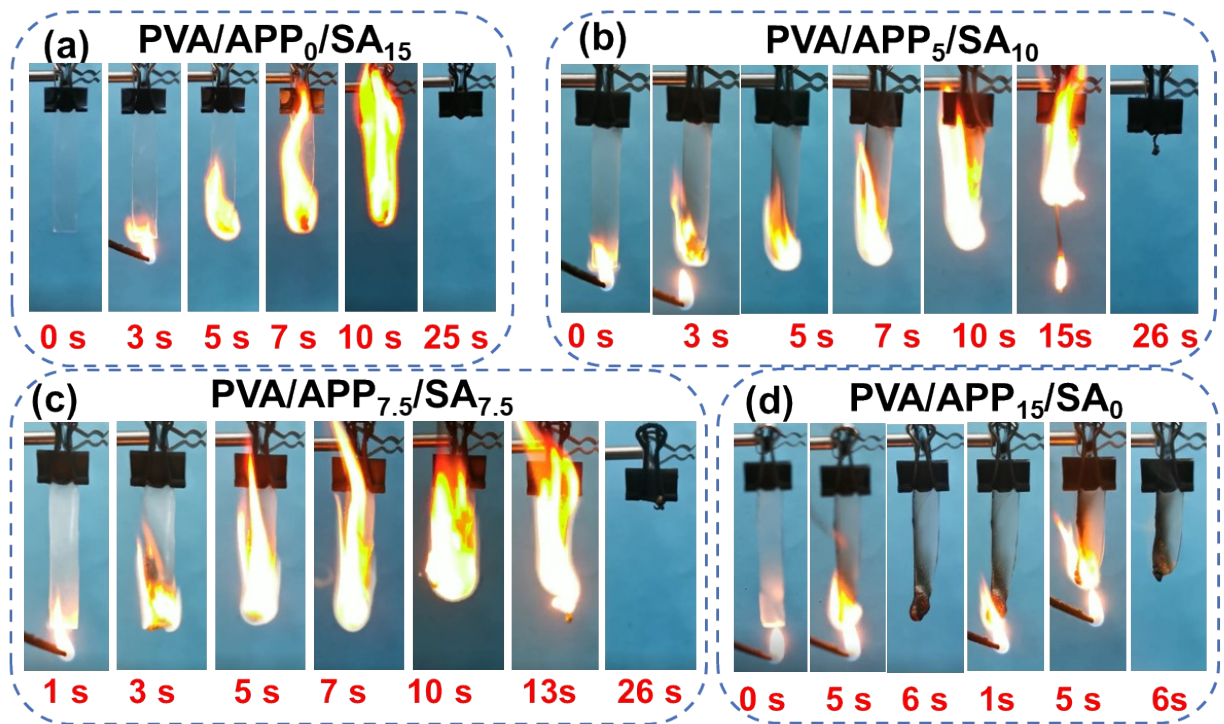

15

16 **Figure S2.** Optical images of Vertical combustion for PVA/APP<sub>0</sub>/SA<sub>15</sub> (a), PVA/APP<sub>5</sub>/SA<sub>10</sub> (b),

17

PVA/APP<sub>7.5</sub>/SA<sub>7.5</sub> (c) and PVA/APP<sub>15</sub>/SA<sub>0</sub> (d) at different time period.

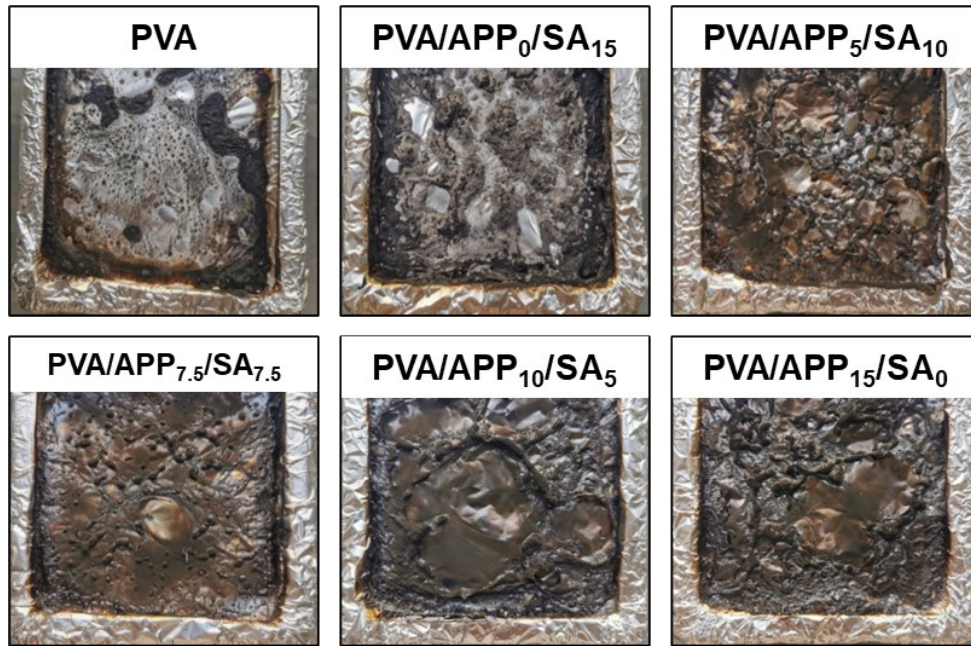

18

19

**Figure S3.** Optical images of carbon residue after cone calorimeter test for PVA and PVA composites.

20

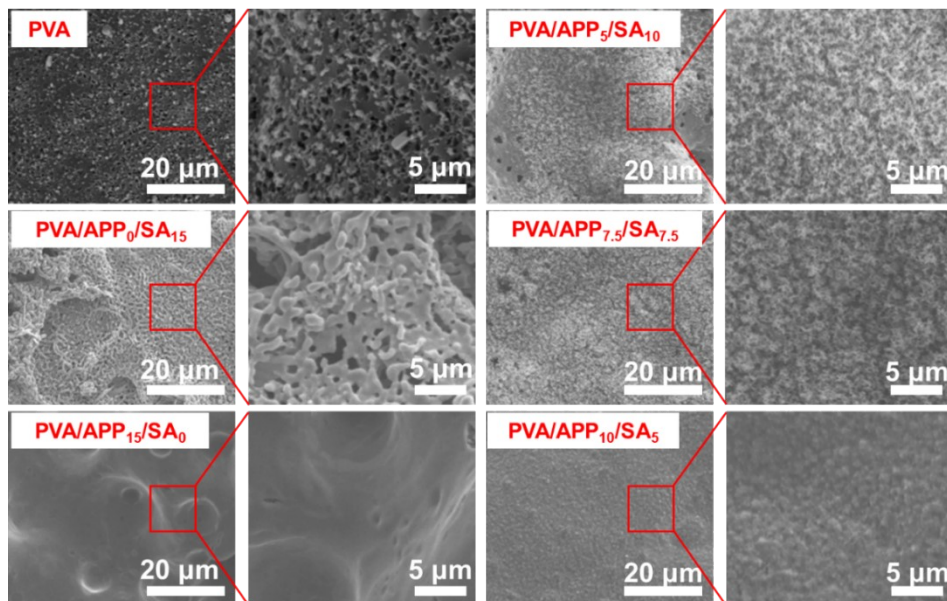

21

22

**Figure S4.** The SEM images of carbon residue after cone calorimeter test.

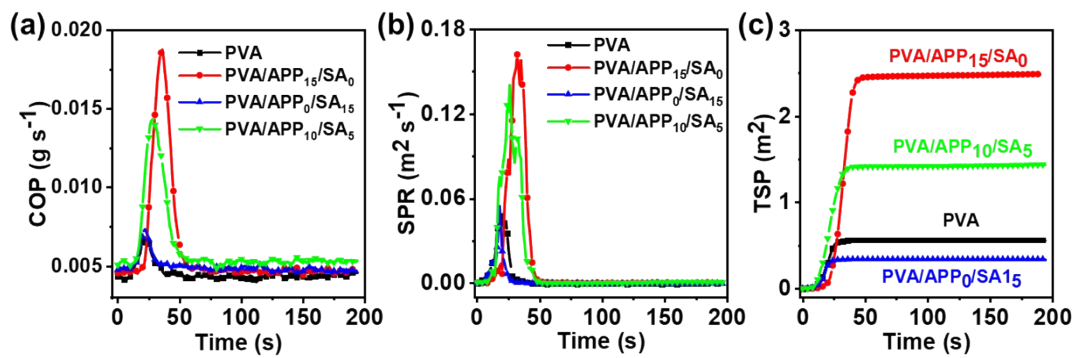

23

24 **Figure S5.** (a) CO production, (b) Smoke produce rate and (c) Total smoke release curves of PVA

25

and FR-PVA composites obtained from cone calorimeter test

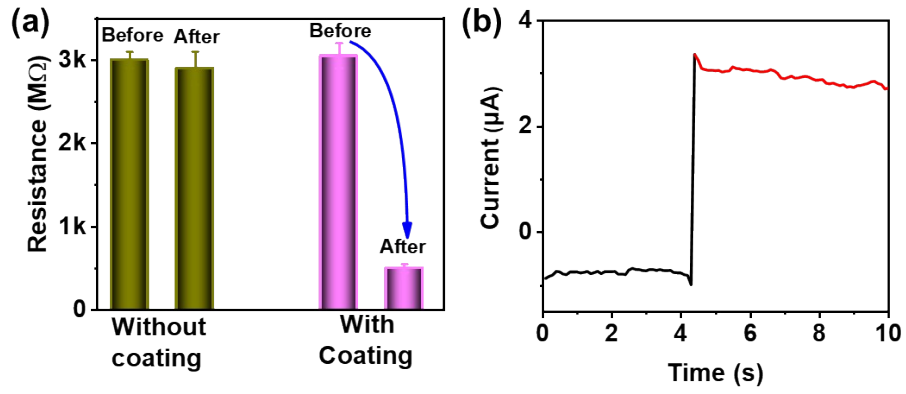

26

27 **Figure S6.** (a) The resistance variation of carbon residue before and after combustion for wood

28 without and with FR-PVA coating. (b) Evolution of current of carbon residual during combustion.

29 **Table S1.** Comparison of flame retardance of As-designed FR-PVA with previous PVA  
 30 counterparts.

| <b>Flame retardant system</b>                                             | <b>Add (%)</b> | <b>LOI (%)</b> | <b><math>\Delta</math>LOI (%)</b> | <b>pHRR (kW m<sup>-2</sup>)</b> | <b><math>\Delta</math>pHRR (%)</b> | <b>Residue (wt%)</b> | <b>ref</b>                 |
|---------------------------------------------------------------------------|----------------|----------------|-----------------------------------|---------------------------------|------------------------------------|----------------------|----------------------------|
| <b>Graphene nanosheets</b>                                                | <b>2</b>       | <b>22</b>      | <b>13.4</b>                       | <b>193</b>                      | <b>60.9</b>                        | <b>*</b>             | <b>[Qiu et al. 2020]</b>   |
| <b>Carbon nanoparticles</b>                                               | <b>3</b>       | <b>*</b>       | <b>*</b>                          | <b>225</b>                      | <b>32.0</b>                        | <b>2.36</b>          | <b>[Zahid et al. 2020]</b> |
| <b>Phosphate cellulose</b>                                                | <b>15</b>      | <b>34.0</b>    | <b>88.8</b>                       | <b>255.4</b>                    | <b>33.8</b>                        | <b>18.6</b>          | <b>[Wei et al. 2021]</b>   |
| <b><math>\alpha</math>-zirconium phosphate</b>                            | <b>20</b>      | <b>29.8</b>    | <b>61.9</b>                       | <b>105.7</b>                    | <b>82.3</b>                        | <b>35.0</b>          | <b>[Zhang et al. 2020]</b> |
| <b>Boron nitride and ammonium polyphosphate</b>                           | <b>28.6</b>    | <b>29.5</b>    | <b>48.2</b>                       | <b>153</b>                      | <b>71.1</b>                        | <b>26</b>            | <b>[Zhang et al. 2019]</b> |
| <b>Calcium bis(dihydrogenphosphate) and hexachlorocyclotriphosphazene</b> | <b>30</b>      | <b>25.6</b>    | <b>42.2</b>                       | <b>117.1</b>                    | <b>75</b>                          | <b>39.5</b>          | <b>[Zhang et al. 2021]</b> |
| <b>Sodium alginate and Pyrovatex CP</b>                                   | <b>41.2</b>    | <b>30.4</b>    | <b>58.3</b>                       | <b>*</b>                        | <b>*</b>                           | <b>27</b>            | <b>[Wang et al. 2020]</b>  |
| <b>Agarose macromolecules</b>                                             | <b>50</b>      | <b>*</b>       | <b>*</b>                          | <b>170.76</b>                   | <b>37</b>                          | <b>*</b>             | <b>[Yan et al. 2021]</b>   |
| <b>Sodium alginate and ammonium polyphosphate</b>                         | <b>15</b>      | <b>30.2</b>    | <b>67.8</b>                       | <b>306.25</b>                   | <b>30.6</b>                        | <b>17.28</b>         | <b>This work</b>           |

31

32

34 **Table S2.** The samples composition table of FR-PVA composites.

| Samples                                   | PVA (g) | APP (g) | SA (g) |
|-------------------------------------------|---------|---------|--------|
| PVA                                       | 8.5     | 0       | 0      |
| PVA/APP <sub>15</sub> /SA <sub>0</sub>    | 8.5     | 1.5     | 0      |
| PVA/APP <sub>0</sub> /SA <sub>15</sub>    | 8.5     | 0       | 1.5    |
| PVA/APP <sub>10</sub> /SA <sub>5</sub>    | 8.5     | 1.0     | 0.5    |
| PVA/APP <sub>7.5</sub> /SA <sub>7.5</sub> | 8.5     | 0.75    | 0.75   |
| PVA/APP <sub>5</sub> /SA <sub>10</sub>    | 8.5     | 0.5     | 1.0    |



36 **Reference**

- 37 Qiu, M. H., Wang, D., Zhang, L. P., Li, M., Liu, M. M., & Fu, S. H. (2020).  
38 Electrochemical exfoliation of water-dispersible graphene from graphite  
39 towards reinforcing the mechanical and flame-retardant properties of poly  
40 (vinyl alcohol) composites. *Materials Chemistry and Physics*, 254, 123430.
- 41 Zahid, M., Ali, S., Saleem, S., Salman, M., & Khan, M. (2020). Carbon  
42 nanoparticles/polyvinyl alcohol composites with enhanced optical, thermal,  
43 mechanical, and flame-retardant properties. *Journal of Applied Polymer  
44 Science*, 137(41), 49261.
- 45 Wei, J. X., Zhao, C. X., Li, Y. C., Li, Y. T., Sun, Z. M., Xiang, D., & Li, H. (2021). A  
46 simple and green strategy for preparing poly(vinyl alcohol)/phosphate cellulose  
47 aerogel with enhanced flame-retardant properties. *Polymer Engineering &  
48 Science*, 61(3), 693–705.
- 49 Zhang, Z. H., Ma, Z. Y., & Wang, Y. H. (2020). Green and facile fabrication of  $\alpha$ -  
50 zirconium phosphate-based core-multishell nanoparticles for enhancing fire  
51 retardant performance of poly(vinyl alcohol). *ACS Applied Nano Materials*,  
52 3(9), 8708–8718.
- 53 Zhang, Q. R., Wang, X. Y., Tao, X. J., Li, Z. W., Li, X. H., & Zhang, Z. J. (2019).  
54 Polyvinyl alcohol composite aerogel with remarkable flame retardancy,  
55 chemical durability and self-cleaning property. *Composites Communications*,  
56 15, 96–102.
- 57 Zhang, D., Meng, D. H., Ma, Z. Y., Zhang, Z. H., Ning, H. Z., & Wang, Y. H. (2021).  
58 Synthesis of a novel organic-inorganic hybrid flame retardant based on  
59  $\text{Ca}(\text{H}_2\text{PO}_4)_2$  and hexachlorocyclotriphosphazene and its performance in  
60 polyvinyl alcohol. *Journal of Applied Polymer Science*, 138(13), 50099.
- 61 Wang, Q. Q., Liu, J., Zhang, L., Ci, M. Y., Zhang, X. Y., Jiang, Z. M., & Zhu, P. (2020).  
62 Preparation and characterization of polyvinyl alcohol/sodium  
63 alginate/Pyrovatex CP composite fibers. *Ferroelectrics*, 562(1), 125–125.
- 64 Yan, T. T., Zou, Y. H., Zhang, X. H., Li, D. H., Guo, X. X., & Yang, D. J. (2021).  
65 Hydrogen bond interpenetrated agarose/PVA network: A highly ionic

66           conductive and flame-retardant gel polymer electrolyte. *ACS Applied Materials*  
67           & *Interfaces*, 13(8), 9856–9864.
